1 **Evidence for a reversal of the neural information flow between object perception and object**  
2 **reconstruction from memory**

3 Juan Linde-Domingo<sup>1</sup>, Matthias S. Treder<sup>2</sup>, Casper Kerren<sup>1</sup> & Maria Wimber<sup>1</sup>

4 <sup>1</sup> School of Psychology, College of Life and Environmental Sciences, University of Birmingham, B15  
5 2TT, UK

6 <sup>2</sup>Cardiff University Brain Research Imaging Centre (CUBRIC), Cardiff University, CF24 4HQ, UK

7 Correspondence: [j.lindedomingo@pgr.bham.ac.uk](mailto:j.lindedomingo@pgr.bham.ac.uk) & [m.wimber@bham.ac.uk](mailto:m.wimber@bham.ac.uk)

8 **Abstract**

9 Remembering is a reconstructive process. Surprisingly little is known about how the reconstruction  
10 of a memory unfolds in time in the human brain. We used reaction times and EEG time-series  
11 decoding to test the hypothesis that the information flow is reversed when an event is reconstructed  
12 from memory, compared to when the same event is initially being perceived. Across three  
13 experiments, we found highly consistent evidence supporting such a reversed stream. When seeing  
14 an object, low-level perceptual features were discriminated faster behaviourally, and could be  
15 decoded from brain activity earlier, than high-level conceptual features. This pattern reversed during  
16 associative memory recall, with reaction times and brain activity patterns now indicating that  
17 conceptual information was reconstructed more rapidly than perceptual details. Our findings  
18 support a neurobiologically plausible model of human memory, suggesting that memory retrieval is  
19 a hierarchical, multi-layered process that prioritizes semantically meaningful information over  
20 perceptual detail.

21

22

23

24

25

26

27

28

29

30

31

32

33

## 34 1. Introduction

35 When Rocky Balboa goes back to his old gym in the film Rocky V, the boxing ring and the feeling of  
36 the dusted gloves in his hands trigger a flood of vivid images from the past. Like in many other  
37 movies featuring such mnemonic flashbacks, the main character seems capable of remembering  
38 what the room looked like years ago, who was there at the time, and even an emotional  
39 conversation with his old friend and coach Michael. Perceptual details like colours, however, are  
40 initially missing in the scene, like in a faded photograph, and only gradually saturate over time. This  
41 common way to depict memories in pop culture nicely illustrates that the memories we bring back  
42 to mind are likely not unitary constructs, and also not veridical copies of past events. Instead, they  
43 suggest that remembering is a reconstructive process that might prioritize more meaningful  
44 components of an event over other more shallow aspects (Schacter, 2012; Schacter, Guerin, & St  
45 Jacques, 2011). We here report three experiments that shed light onto the temporal information  
46 flow during memory retrieval. Once a reminder has elicited a stored memory trace, are the different  
47 features of this memory reconstructed in a systematic, hierarchical way?

48 Considering our vast knowledge about the information processing hierarchy during visual  
49 perception, surprisingly little is known about the time course of memory recall. In the object  
50 recognition literature, it is generally agreed that the presentation of an external stimulus initiates a  
51 processing cascade that starts with low-level perceptual features in early visual areas, and  
52 progresses to increasingly higher levels of semantic integration and abstraction along the inferior  
53 temporal cortex (Carlson, Tovar, Alink, & Kriegeskorte, 2013; Cichy, Pantazis, & Oliva, 2014; Clarke &  
54 Tyler, 2015; Lehky & Tanaka, 2016; Martin, Douglas, Newsome, Man, & Barense, 2018; Serre, Oliva,  
55 & Poggio, 2007). However, mental representations can also be re-created from memory, without  
56 much external stimulation: retrieving a scene from the movie Rocky V will elicit semantic knowledge  
57 about the film (e.g. that the actor is called Sylvester Stallone), but also mental images that can  
58 include fairly low-level details (e.g. whether the scene was in colour or in grey scale). How the brain  
59 manages to bring back each of these features when reconstructing an event from memory remains  
60 an open question. The present series of experiments tested our central working hypothesis that the  
61 stream of information processing is reversed during memory reconstruction compared with the  
62 perception of an external stimulus.

63 Over the last years, multivariate neuroimaging methods have made it possible to isolate brain  
64 activity patterns that carry information about externally presented stimuli, but also about internally  
65 generated mnemonic representations. Importantly, it has been shown that the neural trace that an  
66 event produces during its initial encoding is reinstated in brain activity during its later retrieval (Chen  
67 et al., 2017; Johnson, McDuff, Rugg, & Norman, 2009; Kuhl, Rissman, Chun, & Wagner, 2011;  
68 Michelmann, Bowman, & Hanslmayr, 2016; Staresina, Henson, Kriegeskorte, & Alink, 2012; Wimber,  
69 Alink, Charest, Kriegeskorte, & Anderson, 2015). Most of these studies focused on the reactivation of  
70 abstract information, including a picture's category (Kuhl et al., 2011; Staresina et al., 2012; Wimber  
71 et al., 2015) or the task context in which it was encoded (Johnson et al., 2009). Apart from these  
72 higher-level features, evidence also exists for the reactivation of low-level perceptual details in early  
73 visual areas (Bosch, Jehee, Fernandez, & Doeller, 2014; Waldhauser, Braun, & Hanslmayr, 2016).  
74 Moreover, a growing literature using electrophysiological methods has begun to shed light onto the  
75 timing of such reinstatement, typically demonstrating neural reactivation within the first second  
76 after a reminder is presented (Jafarpour, Fuentemilla, Horner, Penny, & Duzel, 2014; Michelmann et

77 al., 2016; Sols, DuBrow, Davachi, & Fuentemilla, 2017; Staudigl et al., 2012), and sometimes very  
78 rapidly (Waldhauser et al., 2016; Wimber, Maaß, Staudigl, Richardson-Klavehn, & Hanslmayr, 2012).  
79 However, because all existing studies only focused on a single feature of a memory representation  
80 (e.g., its semantic category), the fundamental question whether memory reconstruction follows a  
81 hierarchical information processing stream, similar to perception, has not been investigated.

82 We hypothesize that such a processing hierarchy does exist, and that the information flow is  
83 reversed during memory reconstruction compared with perception. That is, based on the widely  
84 accepted idea that memory reconstruction depends on back-projections from the hippocampus to  
85 neo-cortex (Moscovitch, 2008), we expect that those areas that are anatomically closer to the  
86 hippocampus (i.e. high-level conceptual processing areas along the inferior temporal cortex) should  
87 be involved in the reactivation cascade faster than areas that are relatively remote (i.e., low-level  
88 perceptual processing areas in earlier visual cortices). Therefore, we assume that once a reminder  
89 has initiated the reactivation of an associated event, higher-level abstract information will be  
90 reconstructed before lower-level perceptual information, producing an inverse temporal order of  
91 processing compared with perception.

92 We tested this reverse reconstruction hypothesis in a series of two behavioural and one EEG  
93 experiment (see Fig. 1b, c, and Fig. 3a). All experiments used a simple associative memory paradigm  
94 where participants learn a series of arbitrary associations between word cues and everyday objects,  
95 and are later cued with the word to recall the object. In order to test for a processing hierarchy, it is  
96 important to independently manipulate the perceptual and conceptual contents of these objects.  
97 Therefore, objects varied along two orthogonal dimensions: one perceptual dimension, where the  
98 object can be either presented as a photograph or a line drawing; and a semantic dimension where  
99 the object represents an animate or inanimate entity (Fig. 1a). The two behavioural experiments  
100 measure reaction times while participants make perceptual or semantic category judgments for  
101 objects that are either visually presented on the screen, or reconstructed from memory. The EEG  
102 experiment uses a similar associative recall paradigm together with time-series decoding techniques  
103 (Carlson et al., 2013; Cichy et al., 2014; Kurth-Nelson, Barnes, Sejdinovic, Dolan, & Dayan, 2015),  
104 allowing us to track at which exact moment in time perceptual and semantic components of the  
105 same object are reactivated, and to create a temporal map of semantic and perceptual features  
106 during perception and memory reconstruction (Fig. 3b and c). Our behavioural and  
107 electrophysiological findings consistently support the idea that memory reconstruction is not an all-  
108 or-none process, but rather progresses on each single trial from higher-level semantic features to  
109 lower-level perceptual details.

## 110 **2. Results**

### 111 **2.1. Behavioural experiments**

112 Our two behavioural experiments used reaction times (RTs) to test our central hypothesis that the  
113 information processing hierarchy reverses between the visual perception of an object, and its  
114 reconstruction from memory. We assumed that the time required to answer a question about low-  
115 level perceptual (photograph vs. drawing) compared to high-level semantic (animate vs. inanimate)  
116 features of an item would reflect the speed at which the brain gains access to these types of  
117 information. If so, we expected that reaction time patterns would reverse depending on whether the  
118 object is visually presented or reconstructed from memory: during visual perception, RTs should be

119 faster for perceptual compared with semantic questions to mirror the forward processing hierarchy,  
120 while during retrieval RTs should be faster for semantic compared with perceptual questions if there  
121 is a reversal of that hierarchy.

122 Both experiments used a 2 x 2 mixed design (Fig. 1b and c), where all participants answered  
123 perceptual and semantic questions (factor question type, within-subjects) about the objects.  
124 Importantly, one group of participants was visually presented with the objects while answering  
125 these questions, whereas the other group recalled the same objects from memory (factor task,  
126 between-subjects). The main difference between the two experiments was that in Experiment 1,  
127 both types of features were probed for a given object, and that in Experiment 2, object were  
128 presented on background scenes (not of interest for the present purpose; see Methods section for  
129 details). Overall accuracy in both experiments was near ceiling for the visual reaction time task  
130 (Experiment 1: M = 96.88%; SD = 2.40%; Experiment 2: M = 97.19%, SD = 2.99%), and high for the  
131 memory reaction time task (Experiment 1: 83.15%; SD = 0.92; Experiment 2: M = 66.23%, SD =  
132 15.35). Only correct trials were used for all further RT analyses.

133

134

135

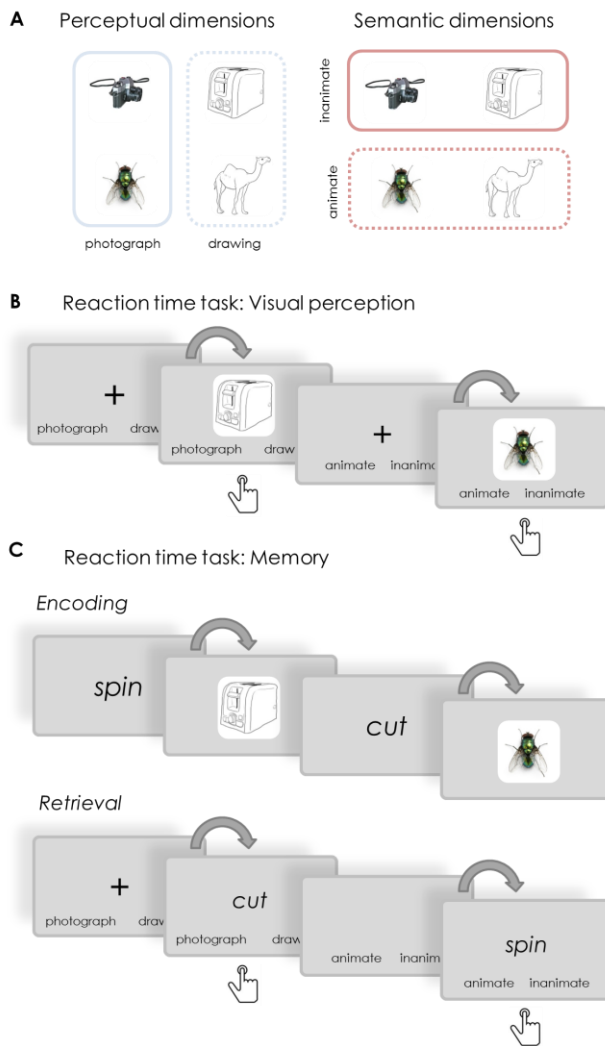

136

137 **Figure 1. Stimuli and design of the behavioural experiments.** (a) Illustration of the orthogonal design of the stimulus set. In  
138 all experiments, objects (a total of 128) varied along two dimensions: a perceptual dimension where objects could be  
139 presented as a photograph or as a line drawing; and a semantic dimension where objects could belong to the animate or  
140 inanimate category. (b) In the visual reaction time task, participants were prompted on each trial to categorize the  
141 upcoming object as fast as possible, either according to its perceptual category (photograph vs. line drawing) or its  
142 semantic category (animate vs. inanimate). (c) During the encoding phase of a memory reaction time task, participants  
143 were asked to create word-object associations (a total of 8 per block). Reaction times were then measured during the  
144 retrieval phase, where subjects were presented with a reminder word, and asked to recall and categorize the associated  
145 object according to its perceptual (photograph vs. line drawing) or semantic (animate vs. inanimate) features. Button press  
146 symbols indicate at which moment in a trial RTs were collected.

### 147 2.1.2. Reaction times show the expected reversal in Experiments 1 and 2

148 To directly test for a reversal of the reaction time pattern between visual perception and memory  
149 reconstruction, we performed an analysis of variance comparing the RTs to perceptual and semantic  
150 questions during visual object presentation and during the cued-recall task. As predicted, we found a  
151 significant interaction between task (visual vs. memory group) and question type (i.e. perceptual vs.  
152 semantic) in Experiment 1 ( $F_{1,42} = 11.142, P = .002$ ) and in Experiment 2 ( $F_{1,46} = 10.876, P = .002$ ).  
153 There was no main effect of question type (Experiment 1:  $F_{1,42} = 3.816, P = .057$ ; Experiment 2:  $F_{1,46}$   
154  $= 3.184, P = .081$ ), suggesting that participants were not generally faster or slower at answering one  
155 type of question compared to the other (Fig. 2a and b).

156 Post-hoc RT analyses were then performed for each task to confirm that this interaction was  
157 produced by differences in the expected direction. In Experiment 1, participants in the visual  
158 perception group were significantly faster when responding to perceptual (M = 795ms; SD = 235ms)  
159 compared to semantic (M = 842ms, SD = 185ms) questions ( $t_{22} = 3.68, P = .001$ ). Importantly, these  
160 differences reversed in the memory retrieval group, where RTs to semantic questions (2334ms; SD =  
161 534 sec) were now significantly faster than RTs to perceptual questions (M = 2502ms; SD = 561;  $t_{20} =$   
162 2.35,  $P = .029$ ). This pattern was fully replicated in Experiment 2, where again the visual RT group  
163 answered perceptual questions (M = 733ms; SD = 211ms) significantly faster than semantic  
164 questions (M = 797ms, SD = 235;  $t_{23} = 2.46, P = .022$ ), whereas the memory group was significantly  
165 faster at responding to semantic questions (M = 3133ms, SD = 660ms) compared with perceptual  
166 questions (M = 3348ms, SD = 754;  $t_{23} = 2.67, P = .014$ ).

167 Since reaction times are not necessarily normally distributed, we also wanted to confirm the results  
168 using a Wilcoxon signed rank test. The significant RT differences between perceptual and conceptual  
169 questions were also present using this non-parametric statistic in the visual perception group  
170 (Experiment 1:  $z = 3.16, P = .002$ ; Experiment 2:  $z = 2.57, P = .010$ ) and in the memory group  
171 (Experiment 1:  $z = 2.48, P = .013$ ; Experiment 2:  $z = 2.42, P = .015$ ). Reaction time analyses thus  
172 support our central hypothesis that the speed of information processing for different object features  
173 reverses between perception and memory, and this pattern fully replicated between Experiments 1  
174 and 2.

### 175 **2.1.3. Accuracy results support a reversal between perception and memory, and suggest a** 176 **directional dependency in the processing hierarchy**

177 Next we investigated whether a similar pattern was, at least qualitatively, also present in terms of  
178 accuracy. We found a significant interaction between task (visual vs. memory group) and question  
179 type (i.e. perceptual vs. semantic question) in both experiments (Experiment 1:  $F_{1, 42} = 14.467, P =$   
180  $.001$ ; Experiment 2:  $F_{1, 46} = 9.698, P = .003$ ). Post-hoc accuracy analyses in Experiment 1 revealed that  
181 in the visual reaction task participants were more accurate at answering perceptual questions (M =  
182 97.42%; SD = 2.68%) compared to semantic ones (M = 96.33%; SD = 1.99%). This difference was not  
183 significant ( $t_{22} = 2.03, P = .055$ ), most likely because accuracy during perception was close to ceiling.  
184 Accuracy in the memory task showed that, in line with a reversed processing stream, participants  
185 had significantly better accuracy for semantic questions compared with perceptual questions (M =  
186 85.83%; SD = 7.57%; vs. 82.63%; SD = 8.79%, respectively;  $t_{20} = 3.12, P = .005$ ). Experiment 2  
187 replicated the same accuracy profile, with participants in the visual group showing a significantly  
188 higher accuracy for perceptual questions (M = 97.97%; SD = 2.77%) compared to semantic questions  
189 (M = 96.41%; SD = 3.07%;  $t_{23} = 2.14, P = .042$ ). The reverse pattern was present in the memory  
190 reaction time task, where an accuracy benefit was found for semantic questions compared to  
191 perceptual ones (69.57%; SD = 15.17%; vs. 62.89%; SD = 15.09%, respectively;  $t_{23} = 2.63, P = .015$ ).  
192 Accuracy profiles thus generally corroborated our reaction time results, again suggesting that  
193 semantic information is more easily accessed during retrieval than perceptual information.

194 The accuracy data from Experiment 1 also allowed us to address an interesting question regarding  
195 the dependency of perceptual and conceptual processing stages. Across the retrieval phase of this  
196 experiment, both types of questions were asked for each given object, and we were thus able to test  
197 to what degree performance on the semantic and perceptual questions was stochastically

198 dependent. Our reasoning was that if the reconstruction of semantic and perceptual aspects from  
 199 memory was a hierarchical process where access to a later stage depended on having completed the  
 200 previous stage(s), as predicted by a reversed stream, then the ability to retrieve perceptual details  
 201 would depend on having accurately retrieved semantic details, but not vice versa. In other words, if  
 202 the retrieval of semantic information was the first stage in a hierarchical stream, it would not  
 203 depend much on any other stages. If on the other hand the retrieval of perceptual information is  
 204 indeed a very late stage in the hierarchy, success at this stage should be considerably influenced by  
 205 success at earlier (semantic) stages. In line with this reasoning, we found that  $P(\text{sem/per})$  – the  
 206 conditional probability of remembering the correct semantic information given the perceptual  
 207 question was answered correctly for the same word-picture association ( $M = 91.61\%$ ;  $SD = 6.98\%$ ) –  
 208 was significantly higher ( $t_{20} = 3.08$ ,  $P = .006$ ) than  $P(\text{per/sem})$  – the conditional probability of  
 209 answering the perceptual question correctly given a correct semantic answer ( $M = 88.28\%$ ;  $SD =$   
 210  $8.34\%$ )(Fig. 2c). For reasons of completeness, we carried out the same conditional probability  
 211 analysis in the visual task. In this group, the opposite trend was present, with  $P(\text{per/sem})$  ( $M =$   
 212  $97.30\%$ ;  $SD = 2.82\%$ ) being numerically higher than  $P(\text{sem/per})$  ( $M = 96.21\%$ ;  $SD = 2.09\%$ ). However,  
 213 this difference was not statistically robust ( $t_{22} = 2.04$ ,  $P = .054$ ), most likely due to ceiling effects.

214 Altogether, the findings from our two behavioural experiments provide support for our main  
 215 hypothesis that during retrieval of a complex visual representation, the temporal order in which  
 216 perceptual and semantic features are processed reverses between perception (feed-forward) and  
 217 memory retrieval (feed-backward). The results suggest that reaction times can be used as a proxy to  
 218 probe neural processing speed, as argued in previous studies (Ritchie, Tovar, & Carlson, 2015). In the  
 219 next sections, we report the findings from an EEG study that more directly taps into the neural  
 220 processes that we believe are producing the behavioural pattern.

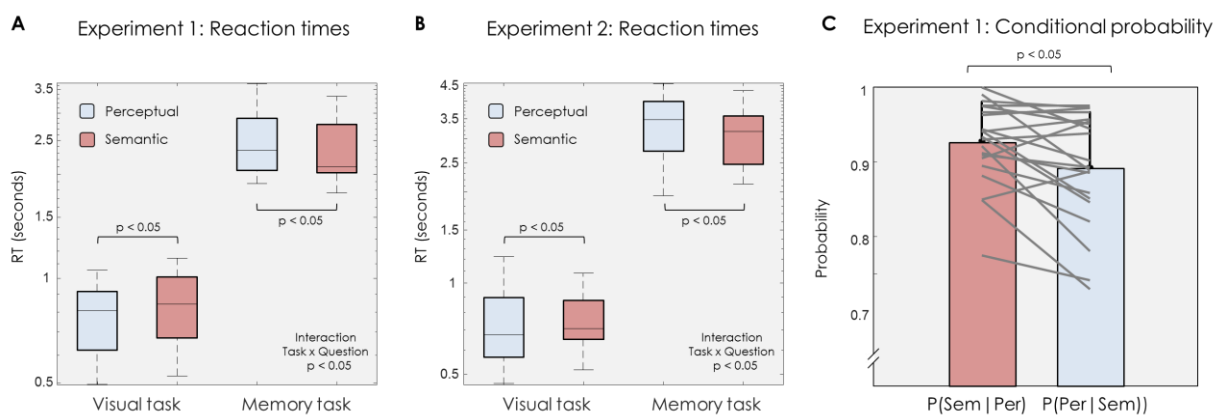

221

222 **Figure 2. Behavioural results.** (a) Box plots representing reaction times in Experiment 1 for perceptual (blue) and semantic  
 223 questions (pink) during object presentation (visual task, left) and object recall (memory task, right). A significant interaction  
 224 was found in a 2x2 ANOVA comparing RTs for perceptual and semantic questions when an object was physically presented  
 225 on the screen (visual task) or cued by a reminder (memory task). (b) Box plots representing reaction times in Experiment 2  
 226 for perceptual and semantic questions during in the visual and memory groups, replicating the results from Experiment 1.  
 227 For illustrative purposes the Y-axis in (a) and (b) is logarithmically scaled. (c) Conditional probability results in Experiment 1.  
 228 The conditional probability of remembering the correct semantic information given the perceptual question was answered  
 229 correctly for the same object,  $P(\text{sem/per})$  was significantly higher than the conditional probability of answering the  
 230 perceptual question correctly given a correct semantic answer,  $P(\text{per/sem})$ . Each line represents the trend for one  
 231 participant. In all three panels, errors bars represent standard error of the mean. The line in the middle of each box  
 232 represents the median, and the tops and bottoms of the boxes the 25th and 75th percentiles of the samples, respectively.  
 233 Whiskers are drawn from the interquartile ranges to the furthest minimum (bottom) and maximum (top) values.

## 234 **2.2. EEG experiment**

235 While it is reasonable to assume that reaction times tap into the neural processing speed for a given  
236 feature, based on previous literature (Ritchie et al., 2015), we also wanted to obtain a more direct  
237 signature of feature activation from human brain activity. We therefore used multivariate pattern  
238 analysis applied to electrophysiological (EEG) recordings, with the goal to pinpoint when in time, on  
239 an individual trial, the perceptual and semantic features of an object could be decoded from brain  
240 activity. We expected to find the maximum decodability of perceptual information before semantic  
241 information when an object was visually presented on the screen, and expected the order of these  
242 peaks to reverse when the object was recalled from memory. The design closely followed the  
243 behavioural experiments, with the important difference that all factors were manipulated within  
244 subjects, such that each participant carried out a visual encoding phase that served to probe visual  
245 (forward) processing, and a subsequent recall phase used to probe mnemonic (backward) processing  
246 (Fig. 3). The trial timing was optimised for obtaining a clean signal during object presentation and  
247 object recall, rather than for measuring reaction times. We therefore presented the perceptual and  
248 semantic questions only during the recall phase in order to probe memory accuracy, and questions  
249 were presented at the end of each recall trial, such that they would not bias processing towards  
250 perceptual or semantic features of the object.

### 251 **2.2.1 Accuracy in the EEG study replicates the response pattern found in the behavioural** 252 **experiments**

253 In the retrieval phase of the EEG experiment, subjects were again cued with a word and asked to  
254 retrieve the associated object. On average participants subjectively declared to retrieve the object  
255 on 93.6% of the trials (SD = 5.89%), with an average reaction time of 3046ms (SD = 830ms; minimum  
256 = 1369ms; maximum = 5124ms) to make this response. We then asked two objective questions at  
257 the end of each trial, one perceptual and one semantic, which participants answered with an overall  
258 mean accuracy of 86.37% (SD = 6.6). Mirroring our behavioural experiments, hit rates for answering  
259 the semantic question were 87.65% (SD = 6.57%), significantly higher ( $t_{20} = 5.16$ ,  $P = .001$ ) than the  
260 accuracy for the perceptual question (M = 85.08%; SD = 6.53%). Note that the EEG task was not  
261 designed to measure reaction times, and participants were instructed to prioritize accuracy over  
262 speed.

### 263 **2.2.2 Single-trial classifier fidelity suggests a reversal of information processing between** 264 **perception and memory recall**

265 In order to determine the temporal trajectory of feature processing on a single trial level, we carried  
266 out a series of time resolved decoding analyses. Linear discriminant analysis (LDA, see Method  
267 section) was used to classify perceptual (photograph vs. line drawing) and semantic (animate vs.  
268 inanimate) features of an object based on the EEG topography at a given time point, either during  
269 object presentation (encoding) or during object retrieval from memory (cued recall).

270 Our first aim was to confirm that there was a forward stream during perceptual object processing.  
271 Two separate classifiers were therefore trained and tested during encoding to classify the perceptual  
272 category (photograph vs. line drawing) and the semantic category (animate vs. inanimate) of the to-  
273 be-encoded object, respectively, in each trial and time point per participant (see Fig. 3). For these  
274 analyses, decoding was performed in separate time windows starting 100ms before stimulus onset



275 and up until 500ms post-stimulus. Our main interest was to determine the specific moment in each  
276 trial at which the two classifiers showed the highest fidelity in determining the correct perceptual  
277 and semantic categories (Fig. 3b and c). For the encoding data, we thus identified the highest  $d$  value  
278 peak per trial within 500ms of stimulus onset (see Methods section). This approach allowed us to  
279 compare, within each encoding trial, whether the classification peak for perceptual features  
280 occurred earlier than the classification peak for semantic features.

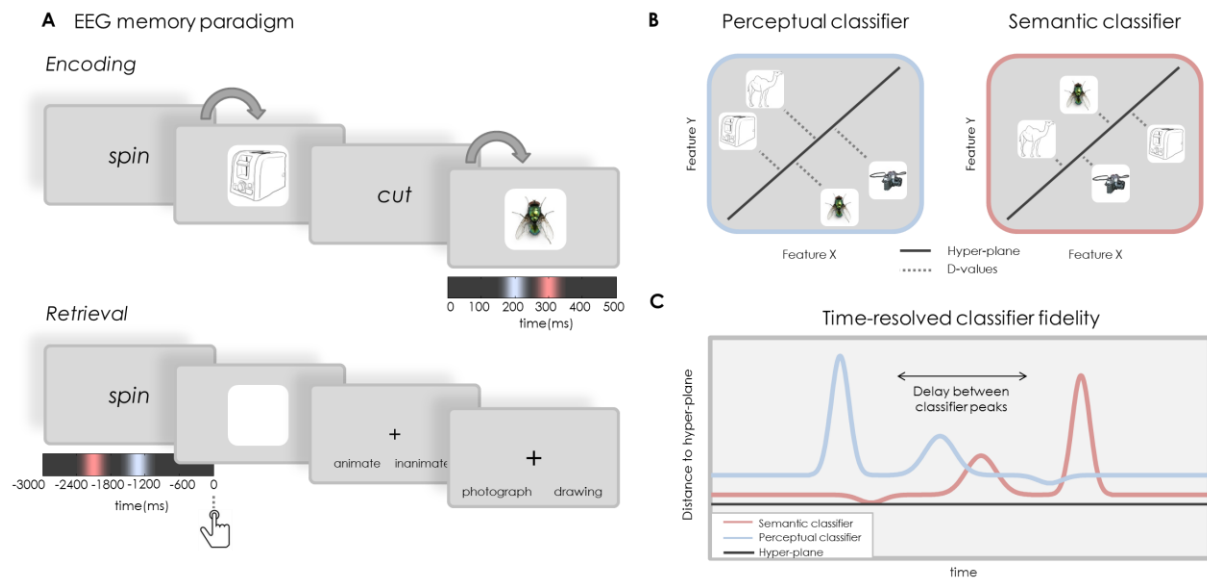

281

282 **Figure 3. Design for EEG experiment and time resolved multivariate decoding.** In the EEG experiment participants were  
283 asked to create word-object associations (panel A), and to later reconstruct the object as vividly as possible when cued  
284 with the word, and to indicate with a button press when they had a vivid image back in mind. EEG was recorded during  
285 learning and recall, with the aim to perform time-series decoding analyses that can detect at which moment, within a  
286 single trial, a classifier is most likely to categorise perceptual and semantic features correctly. Coloured time lines under  
287 object and cue time windows represent our reversal hypothesis regarding the temporal order of maximum semantic (pink)  
288 and perceptual (blue) classification during the perception (encoding) and retrieval of an object. All EEG analyses were  
289 aligned to the object onset during encoding, and to the button press during retrieval. (b) Decoding analyses were  
290 performed independently per participant at each time point. For each given time point during a trial, two linear  
291 discriminant analysis (LDA) based classifiers were trained on the EEG signal: one perceptual classifier discriminating  
292 photographs from line drawings, and one semantic classifier discriminating animate from inanimate objects. Classifiers  
293 were tested using a leave-one-out procedure, which allowed us to obtain a time series of confidence values ( $d$ -values,  
294 reflecting the distance from the separation hyperplane) for each single trial. (c) Our main interest was to compare the time  
295 points of maximal fidelity of the perceptual (blue) and semantic classifiers (pink) on each trial, to test the hypothesis that  
296 the perceptual maximum (blue) precedes the semantic one (pink) during perception (encoding, panel A), and importantly  
297 that this order is reversed during memory recall (panel B).

298 Comparing all single trial  $d$  value peaks from encoding (Fig. 4a), we found a significant difference ( $z =$   
299  $1.87$ ,  $P = 0.03$ ) between the timing of perceptual and semantic peaks using a one-tailed Wilcoxon  
300 signed rank test, suggesting that confidence peaks for perceptual classification occurred before  
301 those for semantic classification. The obtained Z score was compared against a bootstrapped data  
302 set (see Methods section) to estimate the likelihood of obtaining a distance between peaks of the  
303 same or larger size from a distribution with randomly shuffled category labels, using the same EEG  
304 epochs and the same time window. The observed difference score ( $z = 1.87$ ) exceeded the 95<sup>th</sup>  
305 percentile ( $z = 1.64$ ) of the random distribution. This result from the encoding phase of the  
306 experiment thus confirms previous studies showing that low-level features are processed before

307 high-level features during visual perception (Carlson et al., 2013; Cichy et al., 2014; Clarke & Tyler,  
308 2015; Lehky & Tanaka, 2016; Serre et al., 2007).

309 Importantly, following the same procedure, we next analysed the differences between the  
310 perceptual and semantic classifier peaks during memory reactivation, to test whether the order  
311 reversed during retrieval compared with encoding. The single-trial approach made sure that the  
312 relative temporal order of perceptual and semantic peaks within a trial would be preserved even if  
313 the retrieval process was set off with a varying delay across trials. To further minimize variance  
314 between the retrieval trials, we aligned all trials relative to the button press, i.e. the moment when  
315 participants declared that they had retrieved the associated object from memory. The time window  
316 used in this analysis covered 3sec prior to participants' response and, based on behavioural reaction  
317 times, only trials with a RT  $\geq$  3 sec were included. Using a one-tailed Wilcoxon signed rank test, a  
318 significant difference ( $z = 2.53$ ,  $P = .006$ ) was found when we compared  $d$  value peak distributions of  
319 perceptual with those of semantic classification obtained from all single trials and participants (Fig.  
320 4b). The obtained Z score was again higher than the 95<sup>th</sup> percentile ( $z = 1.59$ ) of the random  
321 distribution of a bootstrapped data set (see Methods section) using the same EEG signal and time  
322 window. Critically, the one-tailed test in this case confirms our central hypothesis that during  
323 memory retrieval, semantic information can be classified in brain activity significantly earlier than  
324 perceptual information, suggesting a reversal of information flow relative to perception.

325 The last classification analysis was aimed at confirming the results obtained from the previous single-  
326 trial, fixed-effects analyses using a random-effects approach. We calculated the average  $d$  value  
327 peak latency for perceptual and semantic classification in each participant, and performed a 2x2  
328 ANOVA with stage (encoding vs. retrieval) and type of feature (perceptual vs. semantic) as within-  
329 subject factors. Confirming our main hypothesis, this analysis revealed a significant interaction ( $F_{1,20}$   
330  $= 4.63$ ,  $P = .044$ ) between stage and the type of feature. We further found a main effect of type of  
331 feature ( $F_{1,20} = 4.80$ ,  $P = .04$ ). Post-hoc T-tests showed no significant difference ( $t_{20} = 0.67$ ,  $P = .253$ )  
332 between the average perceptual and semantic  $d$  value peaks during encoding (Fig. 4c). However,  
333 during retrieval, we found that the semantic classifier systematically ( $t_{20} = 2.20$ ,  $P = .020$ , one-tailed)  
334 peaked earlier than the perceptual classifier (Fig. 4d). These findings indicate that even though a  
335 single-trial comparison of classifier fidelity is more sensitive to the temporal dynamics of feature  
336 processing, the same pattern is also present in the average classification values.

337 Overall, the results again confirm our hypothesis that the information processing hierarchy reverses  
338 between perception (encoding) and recall, and that memory recall prioritizes semantic over  
339 perceptual information.

340

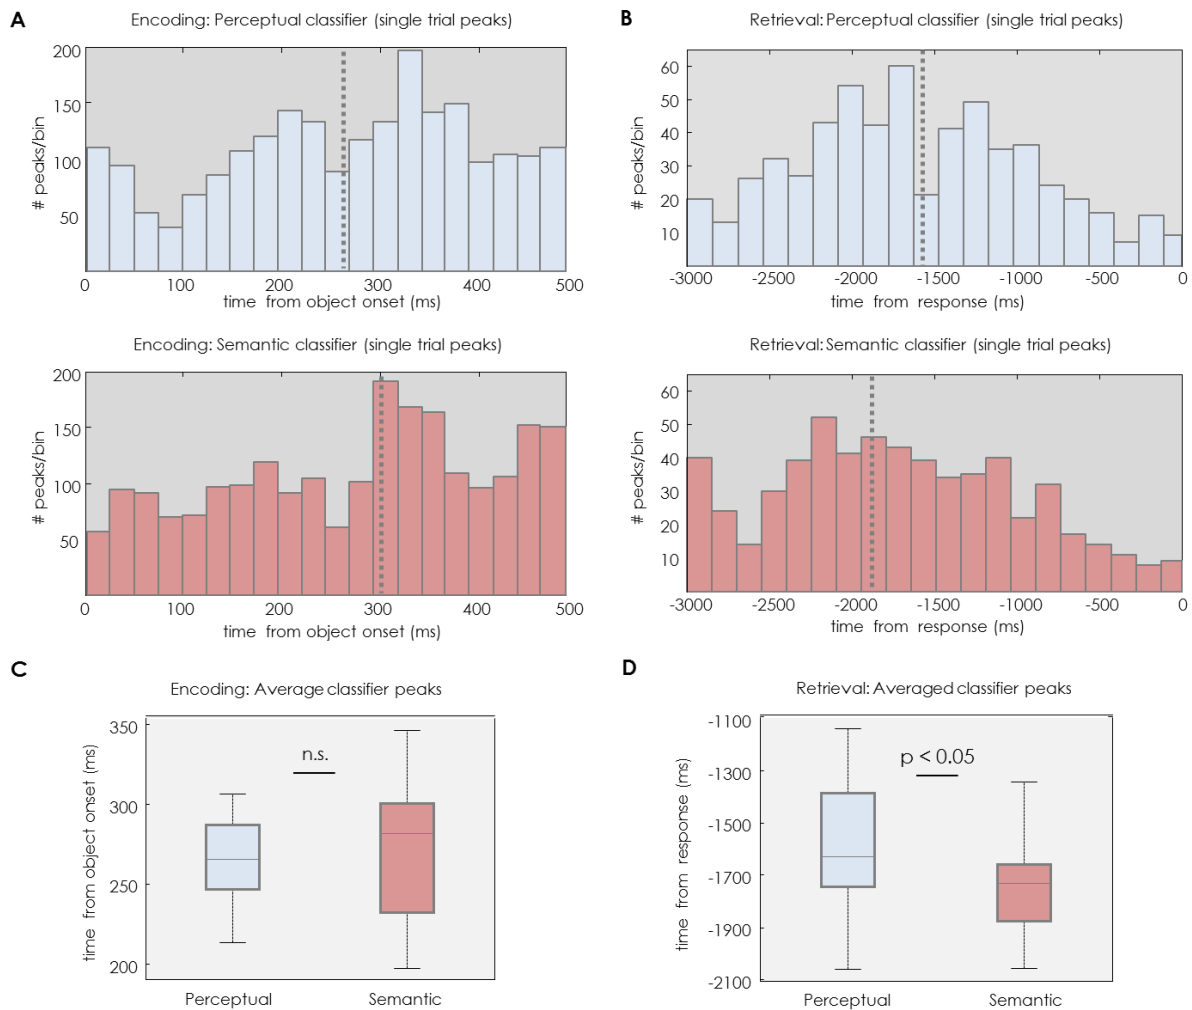

341

342 **Figure 4. EEG multivariate analysis results.** Classifier fidelity in terms of single-trial  $d$  value peak distributions (dashed lines  
 343 represent the median) during object encoding (a) and object retrieval (b), shown separately for classifying perceptual  
 344 (blue) and semantic (pink) classes. A significant difference between the two peak distributions was found during object  
 345 encoding ( $P = .015$ ), indicating a bias towards earlier occurrence of perceptual (blue) compared with semantic (pink) peaks.  
 346 During object retrieval, a significant difference between the distributions was found ( $P = .006$ ) in the opposite direction  
 347 relative to encoding, with semantic peaks now occurring earlier than perceptual peaks. Box plots represent group peak  
 348 distribution of  $d$  values for perceptual and semantic categories during encoding (c) and retrieval (d) after averaging peaks  
 349 within participants. A significant interaction ( $P = .048$ ) was found between task (encoding or retrieval) and type of feature  
 350 (i.e. perceptual or semantic). n.s. indicates a non-significant T-value in posthoc tests. All box plots elements represent the  
 351 same metrics as in Figure 2.

### 352 2.2.3 Univariate ERP results are consistent with the reverse processing hypothesis

353 In a final step, we also sought to corroborate our findings by more conventional event-related  
 354 potential (ERP) analyses. If the differences in neural activity between perceptual (photograph vs. line  
 355 drawing) and semantic (animate vs. inanimate) categories, as picked up by the LDA classifier, were  
 356 produced by a signal that is relatively stable across trials and participants, we expected to see these  
 357 signal differences in the average ERP time courses across participants. A comparison of the ERP  
 358 peaks during encoding and retrieval would then reveal the same perception-to-memory reversal as  
 359 found in our multivariate analyses.

360 Firstly, a series of cluster-based permutation tests (see Methods section) was performed during  
361 object presentation to test for ERP differences between perceptual and semantic categories.  
362 Contrasting objects from the two different perceptual categories (photographs and line drawings),  
363 we obtained a significant positive cluster ( $P_{corr} = .008$ ) between 136ms and 232ms after stimulus  
364 onset, with a maximum difference based on the sum of T values at 188ms, and located over occipital  
365 and central electrodes (see Fig. 5a). Contrasting objects from the different semantic categories  
366 (animate and inanimate) revealed a later cluster over frontal and occipital electrodes ( $P_{corr} = .001$ )  
367 from 237ms until 357ms after stimulus presentation, with a maximum difference at 306ms (see Fig.  
368 5a). The peak semantic ERP difference for encoding thus occurred ~120ms after the peak perceptual  
369 difference, consistent with the existing ERP literature (Fabiani, M., Gratton, G., & Federmeier, 2007) .

370 Similar contrasts between perceptual and semantic categories were then carried out during  
371 retrieval, aligning trials to the time of the button press. We found a significant perceptual cluster  
372 distinguishing the recall of photographs and line drawings over occipital electrodes ( $P_{corr} = .046$ )  
373 between 1390ms and 1336ms before participants' responses, with a maximum difference based on  
374 the sum of T values at 1360ms prior to response time (see Fig. 5b). Comparing ERPs for the different  
375 semantic categories, we found a significant cluster distinguishing the recall of animate from  
376 inanimate objects over frontal electrodes ( $P_{corr} = .032$ ) between 1781ms and 1735ms before object  
377 retrieval, with a maximum difference at 1770ms (see Fig. 5b). Therefore, during memory retrieval,  
378 the peak semantic ERP difference occurred ~400ms before the peak perceptual difference. Note that  
379 the timing of the effects also coincides with the timing of the classifier results in terms of the  
380 maximum differences between perceptual and semantic categories (see Fig. 4). The ERP results thus  
381 mirror, qualitatively, the results of our previous multivariate analyses in terms of the timing of the  
382 maximum signal difference between categories. Again, these results suggest that perceptual aspects  
383 are coded in brain activity earlier than semantic aspects during visual processing, but semantic  
384 differences dominate the EEG signal earlier than perceptual ones during retrieval.

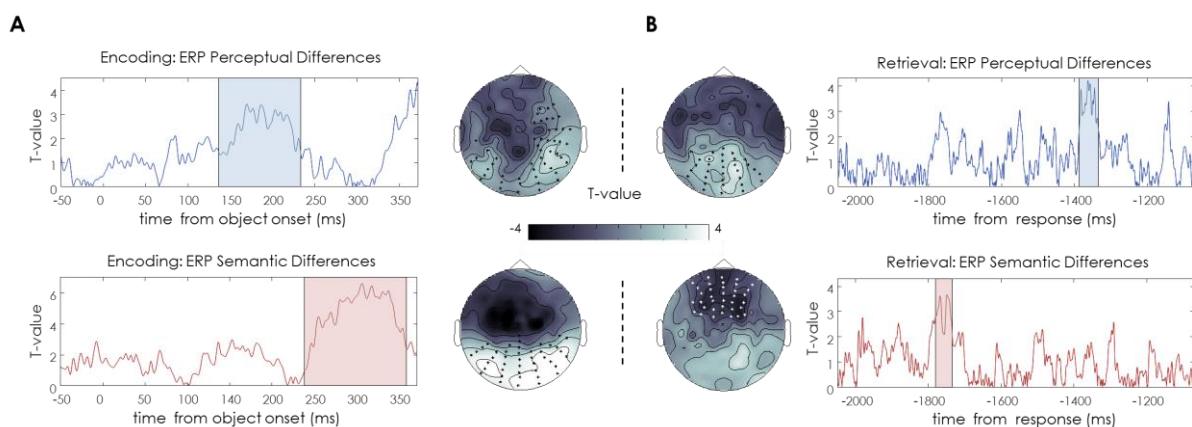

385

386 **Figure 5. Univariate analysis results.** (a) Left panels represent ERP group differences (T-values) across time in those  
387 electrodes that formed a significant cluster during object presentation, locked to the onset of the stimulus. Top left panel  
388 shows the contrast of photographs vs. line drawings, and the bottom left panel differences between animate vs. inanimate  
389 objects. Scalp figures next to each contrast illustrate the maximum cluster's topography, averaged across the significant  
390 time-window, with all significant electrodes in a cluster being marked with an asterisk. (b) Right panels show ERP group  
391 differences (T-values) over time in those electrodes that are contained in the maximum significant clusters during memory  
392 retrieval, time locked to participants' responses). The top right panel shows the perceptual contrast, and the bottom right

393 panel the semantic contrast. Cluster topographies for each comparison are located next to each panel, and the temporal  
394 extent of significant clusters is shaded in colour.

### 395 **3. Discussion**

396 When a memory is triggered by a reminder, how does its neural fingerprint unfold in time? While it  
397 is widely accepted that object recognition starts with low-level perceptual followed by high-level  
398 abstract processing (Carlson et al., 2013; Cichy et al., 2014; Lehky & Tanaka, 2016; Serre et al., 2007),  
399 much less is known about the mnemonic processing cascade. Here we demonstrate that the  
400 reconstruction of a visual memory does depend on a hierarchical stream too, but this mnemonic  
401 stream follows the reverse order relative to visual processing. Across three experiments, we found  
402 highly converging evidence in favour of such a reversal from behavioural reaction times and accuracy  
403 (Experiments 1 and 2), from multivariate classification analyses, and from univariate ERP analyses  
404 (Experiment 3).

405 The behavioural studies demonstrate that participants were significantly faster at detecting low-  
406 level perceptual differences than abstract, conceptual differences during a visual classification task,  
407 i.e. while an object was presented on the screen. Critically, however, when we asked participants to  
408 categorize the perceptual or semantic components of objects recalled from memory, the reverse  
409 effect was found: subjects required significantly less time to correctly retrieve semantic information  
410 about the object compared to perceptual details (see Fig. 2a and Fig. 2b). This reversal was  
411 corroborated by a significant interaction between the kind of feature (perceptual or semantic) and  
412 the kind of task (visual perception or memory recall task). Based on signal-detection models (Ashby,  
413 2000; O'Connell, Dockree, & Kelly, 2012), the RT findings suggest that during memory  
414 reconstruction, the decision threshold to identify abstract information of a mnemonic  
415 representation is reached before a judgment about low-level information can be made. The  
416 response latency pattern therefore supports our central hypothesis that the temporal order of  
417 feature processing is reversed when retrieving a previously stored representation of an object,  
418 relative to its perception.

419 In addition to reaction times, the same reversal pattern was present in accuracy. Here, the accuracy  
420 profiles from Experiment 1 also allowed us to conduct a conditional probability analysis. Specifically,  
421 we were interested in whether access to semantic features and access to perceptual features are  
422 dependent on each other, and whether the direction of this mutual dependency would provide  
423 evidence for a processing hierarchy. Conditional probabilities revealed that when participants  
424 correctly retrieved perceptual information of a given object, they were highly likely to also make an  
425 accurate response about the semantic features of the same object, but not vice versa (see Fig. 2c). In  
426 other words, retrieving perceptual features required access to semantic features, but retrieving  
427 semantic features did not predict access to perceptual features to the same degree, as would be  
428 expected if the processing stream was hierarchically organized. These findings are consistent with an  
429 information-processing stream where access to perceptual details of a mnemonic representation  
430 depends on having completed the presumably earlier semantic stage, a finding consistent with  
431 hierarchical memory system models (Henson & Gagnepain, 2010).

432 The results from our third, EEG experiment fully support the conclusions drawn from the  
433 behavioural studies. We used temporally resolved multivariate decoding analyses to observe when  
434 in time, during object perception and object retrieval, the perceptual and semantic features of an

435 object would be maximally decodable from a participant's brain activity patterns. These analyses  
436 were carried out on a single trial level such that the fidelity peaks of the perceptual and semantic  
437 classifiers could be directly compared. When an object was visually presented during encoding, the  
438 maximum fidelity ( $d$  value) in classifying perceptual information (photograph vs. line drawings)  
439 occurred significantly earlier (approximately 100 ms) than the maximum for semantic information  
440 (animate vs. inanimate) (see Fig. 4a). This finding is consistent with a predominantly feed-forward  
441 processing stream as described previously (Carlson et al., 2013; Cichy et al., 2014; Clarke & Tyler,  
442 2015; Lehky & Tanaka, 2016; Serre et al., 2007). Conversely, when we asked participants to  
443 reactivate an object's representation from memory, peaks in classifying semantic information were  
444 found roughly 300ms before the peaks for perceptual categories (see Fig. 4b). This reversal in  
445 classifier fidelity was present on a trial-by-trial level but also when averaging peak latencies per  
446 participant (see Fig. 4c and Fig. 4d). Like in the behavioural experiments, a consistent reversal  
447 between perception and memory was supported by a significant interaction between the kind of  
448 feature (perceptual or semantic) and the type of task (perception vs. retrieval). Finally, we also found  
449 the same reversal pattern in the ERP peaks when comparing the maximum ERP difference between  
450 perceptual and semantic object classes. During object perception, the largest perceptual ERP cluster  
451 occurred ~100ms before the semantic ERP cluster, whereas during retrieval the perceptual cluster  
452 followed the semantic one with a lag of about 400ms (see Fig. 5). In summary, our two behavioural  
453 experiments, together with the decoding results and the ERP analyses, provide robust evidence for  
454 our main prediction that semantic features are prioritized over perceptual features during memory  
455 recall, opposite to the well-known forward stream of visual-perceptual processing. Follow-up studies  
456 will need to test whether this reversed stream is robust under different conditions, for example in  
457 tasks that vary the encoding demands to explicitly prioritize the encoding of perceptual over  
458 semantic aspects of an event.

459 In our studies, the behavioural data were acquired separately from the EEG data, in a setting that  
460 was optimized for measuring reaction times. Previous studies simultaneously measuring RTs and  
461 neural activity suggest that a meaningful relationship exists, on a single trial level, between the  $d$   
462 values resulting from EEG classification and human behaviour. In line with signal detection models  
463 (Ashby, 2000; O'Connell et al., 2012), it has been argued that the distance between two or more  
464 categories in a neural representational space can serve as a decision boundary that guides  
465 behavioural categorization (Ritchie et al., 2015). For example, Carlson et al (Carlson, Ritchie,  
466 Kriegeskorte, Durvasula, & Ma, 2014) used fMRI-based activation patterns in late visual brain regions  
467 during an object recognition task, where participants had to make animacy judgements, similar to  
468 our semantic task. They found that the faster the reaction time on a given trial, the further away in  
469 neural space the object was represented relative to the boundary between semantic categories.  
470 Similarly, an MEG study (Ritchie et al., 2015) showed that the decision values during the time points  
471 of maximum decodability, derived in a way similar to our EEG study, were strongly correlated with  
472 reaction times for visual categorization. Both studies thus suggest that during object vision, single-  
473 trial decoding measures reflect a distance between categories in a neural space that directly  
474 translates into behaviour. Even though we did not obtain reaction times during the same trials that  
475 were used for EEG decoding, our findings indicate that this meaningful brain-behaviour relationship  
476 extends to mental object representations during memory reconstruction.

477 How does the reverse reconstruction hypothesis fit with existing knowledge about the neural  
478 pathways involved in memory reconstruction? It is generally accepted that during memory

479 formation, information flows from domain-specific sensory modules via perirhinal and entorhinal  
480 cortices into the hippocampus. Recent evidence suggests that during visual processing, the coding of  
481 perceptual object information is preserved up to relatively late perirhinal processing stages (Martin,  
482 Douglas, Newsome, Man & Barense, 2018). The hippocampus is considered a domain-general  
483 structure (Howard Eichenbaum, 2004; Moscovitch, 2008; Staresina & Davachi, 2008) whose major  
484 role is the associative binding of the various elements that constitute an episode (Davachi, 2006; H.  
485 Eichenbaum, Yonelinas, & Ranganath, 2007; Squire, Stark, & Clark, 2004). The hippocampal code  
486 later allows a partial cue to trigger the reconstruction of these different elements from memory. This  
487 memory reconstruction process is thought to depend on back-projections from the hippocampus to  
488 neocortical areas, causing the reactivation of memory patterns in at least a subset of the areas that  
489 were involved in perceiving the original event. Such reactivation has consistently been reported in  
490 higher-order sensory regions related to processing of complex stimulus and task information  
491 (Johnson et al., 2009; Kuhl et al., 2011; Michelmann et al., 2016; Wimber et al., 2015), but also in  
492 relatively early sensory cortex (Bosch, Jehee, Fernandez, & Doeller, 2014; Waldhauser et al, 2016),  
493 suggesting that in principle higher- and lower-level information can be reconstructed from memory.  
494 Interestingly, however, recent evidence suggests that the semantic structure of complex naturalistic  
495 events is represented in brain activity patterns more consistently when participants reproduce the  
496 event narratives (movies) from memory, as opposed to watching the movies (Chen et al., 2017). Our  
497 work offers a neurobiologically plausible explanation for why higher-order meaningful information  
498 might be prioritized during retrieval. Within the medial temporal lobe, regions that are involved in  
499 the processing of objects and scenes are also activated when retrieving objects and scenes from  
500 memory, but with a delay relative to the actual perception of objects and scenes, consistent with a  
501 reversed information flow (Staresina, Cooper, & Henson, 2013). Intracranial EEG recordings have  
502 shown that connectivity between the entorhinal cortex and the hippocampus changes directionality  
503 between encoding and retrieval (Fell et al., 2016), which could provide the functional basis for  
504 cortical reinstatement. Studies in rodents also indicate that the neural codes that represent certain  
505 spatial trajectories are often replayed in reverse order when the animal is awake and resting,  
506 suggesting a potential role in memory retrieval (Carr & Frank, 2012), and there is very recent work in  
507 humans pointing to reverse replay of spatial sequences during offline states (Kurth-Nelson,  
508 Economides, Dolan, & Dayan, 2016). Finally, previous work using MEG decoding suggests that it is  
509 mainly the later processing stages of the encoding stream that are reactivated during retrieval,  
510 consistent with a prioritization of higher-level information during retrieval (Kurth-Nelson et al.,  
511 2015). Our proposal of a reverse processing hierarchy is thus plausible based on functional anatomy  
512 and the existing literature, even though it has never been explicitly proposed or tested so far.

513 We regard our reverse reconstruction hypothesis as complementary to existing models that address  
514 the nature and timing of different retrieval processes, including the influential dual process model  
515 (for a review see Yonelinas, Aly, Wang, & Koen, 2010). Dual process models focus on recognition  
516 rather than recall tasks, and on the cognitive processes and operations required to access a stored  
517 memory rather than the reactivated features of a memory themselves. They assume that successful  
518 recognition of a previously stored stimulus can be based on a sense of familiarity, or on the  
519 additional recollection of contextual information associated with the stimulus during encoding, an  
520 influential idea in the memory field since the introspective analyses of William James (James, 1890).  
521 While the original model does not explicitly address the time course of these processes, it is now  
522 widely accepted, based on the EEG literature, that familiarity signals occur earlier than recollection

523 signals. Familiarity signals can be detected in the EEG as early as 300ms after the onset of a  
524 recognition probe, while recollection-related activity typically begins to emerge after 500-600ms  
525 (Bridson, Fraser, Herron, & Wilding, 2006; Klimesch et al., 2001; Mecklinger, 2006; Rugg & Curran,  
526 2007). In contrast to the above-mentioned studies, our studies probed memory via cued recall,  
527 where successful recall strongly depends on the recollection of associative information. Within this  
528 recollection process, we find that the semantic “gist” of a memory is accessed before perceptual  
529 details. This hierarchical progression from an early global semantic (i.e., familiarity-like) signal to  
530 more fine-grained recollection might thus be a fundamental principle of retrieval that is shared  
531 between recall and recognition memory.

532 Beyond specific models of declarative memory, there are also interesting parallels between our  
533 findings and visual learning phenomena like the Eureka effect (Ahissar & Hochstein, 1997). The  
534 general idea that perception is shaped by stored representations has been proposed over a century  
535 ago by von Helmholtz (Helmholtz, 1924). A wealth of findings now support the idea that previous  
536 exposures to a stimulus can exert a strong top-down influence on its subsequent perception (for a  
537 review; Aggelopoulos, 2015). Reminiscent of our present findings, Ahissar and Hochstein (2004)  
538 suggest that such visual learning is a top-down process that progresses from high-level to low-level  
539 visual areas with increasing practice. Specifically, they argue that improvements in visual  
540 discrimination tasks (e.g. identifying a tilted line among distractors) are guided by high-level  
541 information (e.g. “the gist of the scene”) during earlier stages of learning, and increasingly more by  
542 low-level information (e.g. line orientations or colours) at later stages. Our findings indicate that  
543 during the reactivation of an object’s stored representation, its high-level features are retrieved  
544 more rapidly than its low-level components. Abstract information might thus be reactivated more  
545 easily and during earlier stages of visual learning, and thus have a stronger driving influence on  
546 performance than more detailed information. Even though speculative at the moment, our reverse  
547 reconstruction framework might thus have explanatory value for findings in related fields of learning  
548 and memory.

549 How our brain brings back to mind past events, and enriches our mental life with vivid images or  
550 sounds or scents beyond the current external stimulation, is still a fascinating and poorly understood  
551 phenomenon. Our present results suggest that memories, once they are triggered by a reminder,  
552 unfold in a systematic and hierarchical way, and that the mnemonic processing hierarchy is reversed  
553 with respect to the major visual processing hierarchy. We hope that these findings can inspire more  
554 dynamic frameworks of memory retrieval that explicitly acknowledge the reconstructive nature of  
555 the process, rather than simply conceptualizing memories as reactivated snapshots of past events.  
556 Such models will help us understand the heuristics and systematic biases that are inherent in our  
557 memories and memory-guided behaviours.

## 558 **4. Methods**

### 559 **4.1. Participants**

560 A total of 49 volunteers (39 female; mean age 20.02 +/- 1.55 years old) took part in behavioural  
561 Experiment 1. Twenty-six of them (19 female; mean age 20.62 +/- 1.62 years old) participated in the  
562 memory reaction time task. Five out of these 26 participants were not included in the final analysis  
563 due to poor memory performance (<66% general accuracy) compared with the rest of the group ( $t_{24}$   
564 = 6.65,  $p < 0.01$ ). Another group of 23 participants (20 female; mean age 19.35 ± 1.11 years)



565 volunteered to participate in the visual reaction time task. In a second behavioural experiment  
566 (Experiment 2), 48 participants were recruited (42 female; mean age 19.25 +/- 0.91 years). Twenty-  
567 four of them performed the memory reaction time task and another group of 24 took part in the  
568 visual reaction time task. For the electrophysiological experiment we recruited a total of 24  
569 volunteers (20 female; mean age 21.91 ± 4.68 years). Since the first 3 subjects we recorded  
570 performed a slightly different task during retrieval blocks (i.e., they were not asked to mentally  
571 visualise the object for 3 seconds, and they had to answer only one of the perceptual and semantic  
572 questions per trial), we did not include these participants in any of the retrieval analyses.

573 All participants reported being native or highly fluent English speakers, having normal (20/20) or  
574 corrected-to-normal vision, normal colour vision, and no history of neurological disorders. We  
575 received written informed consent from all participants before the beginning of the experiment.  
576 They were naïve as to the goals of the experiments, but were debriefed at the end. Participants were  
577 compensated for their time, receiving course credits or £6 per hour for participation in the  
578 behavioural task, or a total of £20 for participation in the electrophysiological experiment. The  
579 University of Birmingham's Science, Technology, Engineering and Mathematics Ethical Review  
580 Committee approved all experiments.

## 581 **4.2. Stimuli**

582 In total, 128 pictures of unique everyday objects and common animals were used in the main  
583 experiment, and a further 16 were used for practice purposes. Out of these, 96 were selected from  
584 the BOSS database (Brodeur, Dionne-Dostie, Montreuil, & Lepage, 2010), and the remaining images  
585 were obtained from online royalty-free databases. All original images were pictures in colour on a  
586 white background. To produce two different semantic object categories, half of the objects were  
587 chosen to be animate while the other half was inanimate. Within the category of inanimate objects,  
588 we selected the same amount of electronic devices, clothes, fruits and vegetables (16 each). The  
589 animate category was composed of an equivalent number of mammals, birds, insects and marine  
590 animals (16 each). With the objective of creating two levels of perceptual manipulation, a freehand  
591 line drawing of each image was created using the free and open source GNU image manipulation  
592 software ([www.gimp.org](http://www.gimp.org)). Hence a total of 128 freehand drawings of the respective 128 pictures of  
593 everyday objects were created. Each drawing was composed of a white background and black lines  
594 to generate a schematic outline of each stimulus. For each subject, half of the objects were pseudo-  
595 randomly chose to be presented as photographs, and half of them as drawings, with the restriction  
596 that the two perceptual categories were equally distributed across (i.e. orthogonal with respect to)  
597 the animate and inanimate object categories. All photographs and line drawings were presented at  
598 the centre of the screen with a rescaled size of 500 x 500 pixels. For the memory reaction time task  
599 and the EEG experiment, 128 action verbs were selected that served as associative cues. Experiment  
600 2 also used colour background scenes of indoor and outdoor spaces (900 x 1600 pixels) that were  
601 obtained from online royalty-free databases, which are irrelevant for the present purpose.

## 602 **4.3. Procedure**

### 603 **4.3.1. Behavioural experiments**

#### 604 **4.3.1.1. Experiment 1**

605 ***Visual reaction time task***

606 Before the start of the experiment, participants were given oral instructions and completed a  
607 training block of 4 trials to become familiar with the task. The main perceptual task consisted of 4  
608 blocks of 32 trials each (Fig.1b). All trials started with a jittered fixation cross (500 to 1500ms) that  
609 was followed by a question screen. On each trial, the question could either be a perceptual question  
610 asking the participant to decide as quickly as possible whether the upcoming object is shown as a  
611 colour photograph or as a line drawing; or a semantic question asking whether the upcoming object  
612 represents an animate or inanimate object. Two possible response options were displayed at the  
613 two opposite sides of the screen (right or left). The options for “animate” and “photograph” were  
614 always located on the right side to keep the response mapping easy. The question screen was  
615 displayed for 3 seconds, and an object was then added at the centre of the screen. In Experiment 2,  
616 this object was overlaid onto a background that filled large parts of the screen. Participants were  
617 asked to categorize the object in line with the question as fast as they could as soon as the object  
618 appeared on the screen, by pressing the left or right arrow on the keyboard. Reaction times (RTs)  
619 were measured to test if participants were faster at making perceptual compared to semantic  
620 decisions.

621 All pictures were presented until the participant made a response but for a maximum of 10 sec, after  
622 which the next trial started. Feedback about participants’ performance was presented at the end of  
623 each experimental block. There were 256 trials overall, with each object being presented twice  
624 across the experiment, once together with a perceptual and once with a semantic question.  
625 Repetitions of the same object were separated by a minimum distance of 2 intervening trials. In each  
626 block, we asked the semantic question first for half of the objects, and the perceptual question first  
627 for the other half.

628 The final reaction time analyses only included trials with correct responses, and excluded all trials  
629 with an RT that exceeded the average over subjects by  $\pm 2.5$  standard deviations (SDs).

630 ***Memory reaction time tasks***

631 The memory version was kept very similar to the visual reaction time task, but we now measured  
632 RTs for objects that were reconstructed from memory rather than being presented on the screen,  
633 and we thus had to introduce a learning phase first. At the beginning of the session, all participants  
634 received instructions and performed two short practice blocks. Each of the overall 16 experimental  
635 blocks consisted of an associative learning phase (8 word-object associations) and a retrieval phase  
636 (16 trials, testing each object twice, once with a perceptual and once with a semantic question). The  
637 associative learning and the retrieval test were separated by a distractor task. During the learning  
638 phase (Fig. 1c), each trial started with a jittered fixation cross (between 500 and 1500ms) that was  
639 followed by a unique action verb displayed on the screen (1500ms). After presentation of another  
640 fixation cross (between 500 and 1500ms), a picture of an object was presented on the centre of the  
641 screen for a minimum of 2 and a maximum of 10 seconds. Participants were asked to come up with a  
642 vivid mental image that involved the object and the action verb presented in the current trial. They  
643 were instructed to press a key (up arrow on the keyboard) as soon as they had a clear association in  
644 mind; this button press initiated the onset of the next trial. Participants were made aware during the  
645 initial practice that they would later be asked about the object’s perceptual properties as well as its  
646 meaning, and should thus pay attention to details including colour and shape. Within a participant,

647 each semantic category and sub-category (electronic devices, clothes, fruits, vegetables, mammals,  
648 birds, insects, and marine animals) was presented equally often at each type of perceptual level (i.e.  
649 as a photograph or as a line drawing). The assignment of action verbs to objects for associative  
650 learning was random, and the occurrence of the semantic and perceptual object categories was  
651 equally distributed over the first and the second half of the experiment in order to avoid random  
652 sequences with overly strong clustering.

653 After each learning phase, participants performed a distractor task where they were asked to classify  
654 a random number (between 1 and 99) on the screen as odd or even. The task was self-paced and  
655 they were instructed to accomplish as many trials as they could in 45 seconds. At the end of the  
656 distractor task, they received feedback about their accuracy (i.e., how many trials they performed  
657 correctly in this block).

658 The retrieval phase (Fig. 1c) started following the distractor task. Each trial began with a jittered  
659 fixation cross (between 500 and 1500ms), followed by a question screen asking either about the  
660 semantic (animate vs. inanimate) or perceptual (photograph vs. line drawing) features for the  
661 upcoming trial, just like in the visual perception version of the task. The question screen was  
662 displayed for 3 seconds by itself, and then one of the verbs presented in the directly preceding  
663 learning phase appeared above the two responses. We asked participants to bring back to mind the  
664 object that had been associated with this word and to answer the question as fast as possible by  
665 selecting the correct response alternative (left or right keyboard press). If they were unable to  
666 retrieve the object, participants were asked to press the down arrow. The next trial began as soon as  
667 an answer was selected. At the end of each retrieval block, a feedback screen showing the  
668 percentage of accurate responses was displayed.

669 Throughout the retrieval test, we probed memory for all word-object associations learned in the  
670 immediately preceding encoding phase in pseudorandom order. Each word-object association was  
671 tested twice, once together with a semantic and once with a perceptual question, with a minimum  
672 distance of 2 intervening trials. In addition, we controlled that the first question for half of the  
673 associations was semantic, and perceptual for the other half. Like in the visual RT task, the response  
674 options for “animate” and “photograph” responses were always located on the right side of the  
675 screen. In total, including instructions, a practice block and the 16 learning-distractor-retrieval  
676 blocks, the experiment took approximately 60 minutes.

677 For RT analyses we only used correct trials, and excluded all trials with an RT that exceeded the  
678 average over subjects by  $\pm 2.5$  SDs.

#### 679 **4.3.1.1. Experiment 2**

680 Experiment 2 was very similar in design and procedures to Experiment 1, and we therefore only  
681 describe the differences between the two experiments in the following.

#### 682 ***Visual reaction time task***

683 The second experiment started with a familiarisation phase where all objects were presented  
684 sequentially. In each trial of this phase, a jittered fixation cross (between 500 and 1500 ms) was  
685 followed by one screen that showed the photograph and line drawing version of one object  
686 simultaneously, next to each other. During the presentation of this screen (2.5 sec) participants were

687 asked to overtly name the object. After a jittered fixation cross (between 500 and 1500 ms), the  
688 name of the object was presented.

689 After this familiarisation phase, the experiment followed the same procedures as the visual reaction  
690 time task in Experiment 1 except for the following changes. Objects were overlaid onto a coloured  
691 background scene (1600 x 900 pixels). Also, each object (286 x 286 pixels) was probed only once,  
692 either together with a perceptual question, a semantic question (like above), or a contextual  
693 question asking whether the background scene was indoor or outdoor. For the current purpose we  
694 only describe the RTs to object-related questions in the Results section. Another minor difference to  
695 Experiment 1 was that in this version of the task, the question screen was displayed for 4sec, and the  
696 two options to answer during stimulus presentation were removed from the screen as soon as the  
697 object/reminder appeared.

#### 698 ***Memory reaction time task***

699 The memory reaction time task in Experiment 2 also included, during the associative learning phase,  
700 a background scene (1600 x 900 pixels) that was shown on the screen behind each object (286 x 286  
701 pixels), and participants were asked to remember the word-background-object combination. In this  
702 version of the task, each word-object association was tested only once, together with either a  
703 perceptual question about the object, a semantic question about the object, or a contextual  
704 question regarding the background scene (indoor or outdoor). Therefore, one third of the objects  
705 were tested with a semantic question, one third with a perceptual question, and one third with a  
706 contextual question. Again, context was not further taken into account in the present analyses.

#### 707 **4.3.2. EEG experiment (Experiment 3)**

708 Following the EEG set-up, instructions were given to participants and two blocks of practice were  
709 completed. The task procedure of the EEG experiment was similar to the memory task in  
710 Experiments 1 and 2 except for the retrieval phase (Fig. 3a). Each block started with a learning phase  
711 where participants created associations between overall 8 action verbs and objects. After a 40 sec  
712 distractor task, participants' memory for these associations was tested in a cued recall test. In total,  
713 the experiment was composed of 16 blocks of 8 associations each.

714 Each trial of the retrieval test started with a jittered fixation cross (500-1500ms), followed by the  
715 presentation of one of the action verbs presented during the learning phase as a reminder.  
716 Participants were asked to visualize the object associated with this action verb as vividly and in as  
717 much detail as possible while the cue was on the screen. To capture the moment of retrieval,  
718 participants were asked to press the up-arrow key as soon as they had the object back in mind; or  
719 the down-arrow if they could not remember the object. This reminder was presented on the screen  
720 for a minimum of 2 sec and until a response was made (maximum 7 sec). Immediately afterwards, a  
721 blank square with the same size as the original image was displayed for 3 sec. During this time,  
722 participants were asked to "mentally visualize the originally associated object on the blank square  
723 space". After a short interval where only the fixation cross was present (500-1500ms), a question  
724 screen was displayed for 10 seconds or until participant response asking about perceptual  
725 (photograph vs. line drawing) or semantic (animate vs. inanimate) features of the retrieved  
726 representation, like in the behavioural tasks. However, in this case both types of questions were  
727 always asked on the same trial, and they were asked at the end of the trial rather than before the

728 appearance of the reminder. The first question was semantic in half of the trials, and perceptual in  
729 the other half. Therefore, each retrieval phase consisted of 8 trials where we tested all verb-object  
730 associations learned in the same block in random order.

#### 731 **4.4. Data Collection (behavioural and EEG)**

732 Behavioural response recording and stimulus presentation were performed using Psychophysics  
733 Toolbox Version 3 (Brainard, 1997) running under MATLAB 2014b (MathWorks). For response inputs  
734 we used a computer keyboard where directional arrows were selected as response buttons.

735 Electroencephalography (EEG) data was acquired using a BioSemi Active-Two amplifier with 128  
736 sintered Ag/AgCl active electrodes. Through a second computer the signal was recorded at a 1024 Hz  
737 sampling rate by means of the ActiView recording software (BioSemi, Amsterdam, the Netherlands).

#### 738 **4.5. EEG Pre-processing**

739 EEG data was pre-processed using the Fieldtrip toolbox (version from 3<sup>rd</sup> August, 2017) for Matlab  
740 (Oostenveld, Fries, Maris, & Schoffelen, 2011). Data recorded during the associative learning phase  
741 was epoched into trials starting 500ms before stimulus onset and lasting until 1500ms after stimulus  
742 offset. The resulting signal was baseline corrected based on pre-stimulus signal (-500ms to onset).  
743 Retrieval epochs contained segments from 4000ms before until 500ms post-response. Since the  
744 post-response signal during retrieval will likely still contain task-relevant (i.e., object specific)  
745 information, we baseline-corrected the signal based on the whole trial. Both datasets were filtered  
746 using a low-pass filter at 100 Hz and a high-pass filter at 0.1 Hz. To reduce line noise at 50 Hz we  
747 band-stop filtered the signal between 48 and 52 Hz. The signal was then visually inspected and all  
748 epochs that contained coarse artefacts were removed. As a result, a minimum of 92 and a maximum  
749 of 124 trials remained per participant for the encoding phase, and a range between 80 and 120 trials  
750 per subject remained for retrieval. Independent component analysis was then used to remove eye-  
751 blink and horizontal eye movement artefacts; this was followed by an interpolation of noisy  
752 channels. Finally, all data was referenced to a common-average-reference (CAR).

#### 753 **4.6. Time resolved multivariate decoding**

754 First, to further increase the signal to noise ratio for multivariate decoding, we smoothed our pre-  
755 processed EEG time courses using a Gaussian kernel with a full-width at half-maximum of 24ms.  
756 Time resolved decoding via linear discriminant analysis (LDA) using shrinkage regularization (Lemm,  
757 Blankertz, Dickhaus, & Müller, 2011) was then carried out using custom-written code in MATLAB  
758 2014b (MathWorks). Two independent classifiers were applied to each given time window and each  
759 trial (see Fig. 3b): one to classify the perceptual category (photograph or line drawing) and one to  
760 classify the semantic category (animate or inanimate). In both decoding analyses, we used  
761 undersampling after artefact rejection (i.e. for the category with more trials we randomly selected  
762 the same number of trials as available in the smallest category). The pre-processed raw amplitudes  
763 on the 128 EEG channels, at a given time point, were used as features for the classifier. LDA  
764 classification was performed separately for each participant and time point using a leave-one-out  
765 cross-validation approach. This procedure resulted in a decision value ( $d$  value) for each trial and  
766 time point, where the sign indicates in which category the observation had been classified (e.g., - for  
767 photographs and + for line drawings in the perceptual classifier), and the value of  $d$  indicates the

768 distance to the hyper-plane that divided the two categories (with the hyper-plane being 0). This  
769 distance to the hyper-plane provided us with a single trial time-resolved value that indicates how  
770 confident the classifier was at assigning a given object to a given category. In order to use the  
771 resulting  $d$  values for further analysis, the sign of the  $d$  values in one category was inverted,  
772 resulting in  $d$ -values that always reflected correct classification if they had a positive value, and  
773 increasingly confident classification with increasingly higher values.

774 Our main intention was to identify the specific moment within a given trial at which each of the two  
775 classifiers showed the highest fidelity, and to then compare the temporal order of the perceptual  
776 and semantic peaks. We thus found the maximum positive  $d$  value in each trial and separately for  
777 the semantic and perceptual classifiers, with the important restriction that we only used peaks with  
778 a value exceeding the 95<sup>th</sup> percentile of the classifier chance distribution (see section on  
779 bootstrapping below), such as to minimize the risk of including meaningless noise peaks. The  
780 resulting output from this approach allowed us to track and compare the temporal “emergence” of  
781 perceptual and semantic classification within each single-trial. In addition to this single-trial analysis,  
782 we also calculated the average  $d$  value peak latency for perceptual and semantic classification in  
783 each participant to compare the two average temporal distributions. Note, however, that many  
784 factors could obscure differences between semantic and perceptual peaks when using this average  
785 approach, including variance in processing speed across trials, e.g. for more or less difficult recalls.  
786 We therefore believe that the single trial values are more sensitive to differences in timing between  
787 the reactivated features.

#### 788 **4.7. Generating an empirical null distribution for the classifier**

789 Previous work has shown that the true level of chance performance of a classifier can differ  
790 substantially from its theoretical chance level that is usually assumed to be  $1/\text{number of categories}$   
791 (Combrisson & Jerbi, 2015; Jamalabadi, Alizadeh, Schönauer, Leibold, & Gais, 2016; Kowalczyk &  
792 Chapelle, 2005). A known empirical null distribution of  $d$  values would allow us to determine a  
793 threshold for considering only those  $d$  value peaks as significant whose values are higher than the  
794 95<sup>th</sup> percentile of this null distribution. We generated such an empirical null distribution of  $d$  values  
795 by repeating our classifier analysis with randomly shuffled labels a number of times, and combined  
796 this with a bootstrapping approach, as detailed in the following.

797 As a first step, we generated a set of  $d$ -value outputs that were derived from carrying out the same  
798 decoding procedure as for the real data (including the leave-one-out cross-validation), but using  
799 category labels that were randomly shuffled at each repetition. This procedure was carried out  
800 independently per participant. On each repetition, before starting the time-resolved LDA, all trials  
801 were randomly divided into two categories with the constraint that each group contained a similar  
802 number of photographs and line drawings, and approximately the same amount of animate and  
803 inanimate objects (the difference in trial numbers was smaller than 8%). The output of one such  
804 repetition per participant was one  $d$ -value per trial and time-point, just as in the real analysis. This  
805 procedure was conducted 50 times per participant for object perception (encoding) and retrieval,  
806 respectively, with a new random trial split and random label assignment on each repetition. For each  
807 participant we thus had a total of 51 classification outputs, one using the real labels, and 50 using  
808 the randomly shuffled labels.

809 Second, we also used the shuffled label outputs in order to generate an empirical Z-score  
810 distribution for our single-trial analyses. Our main statistic of interest with respect to the EEG data  
811 was a Wilcoxon signed rank test comparing the order of the perceptual and semantic classifier peaks  
812 on each single trial. This analysis was based on all available single trials accumulated across  
813 participants, and thus resulted in a high number of degrees of freedom, with a possibly exaggerated  
814 likelihood of finding a significant Z-score. We therefore tested our real data against an empirical Z-  
815 score distribution obtained from a series of bootstrapping analyses that were based on the same  
816 data and simulated the same number of degrees of freedom. For each participant' trial, we took the  
817 outputs from two different classifiers randomly selected from a sample of 52 classifiers (i.e., 50 with  
818 shuffled labels, one real perceptual, and one real semantic). That is, we created two arbitrary  
819 conditions per trial to make a pairwise comparison (emulating our perceptual vs. semantic  
820 conditions). There was a 50:1 chance that the "pseudo-semantic" classifier contained the output of  
821 the real semantic classifier, and likewise a 50:1 chance that the "pseudo-perceptual" classifier  
822 contained the  $d$ -values from the real perceptual classifier. Next, we choose for each type of  
823 condition the highest  $d$  value per trial in the accurate direction and in a given time window, using the  
824 same constraints as for the real classifier outputs. This provided us with one peak per condition  
825 (two) for every trial. To equate the number of degrees of freedom with our contrast of interest, we  
826 randomly selected the same number of pairs as available in the real analysis. Finally, a Wilcoxon  
827 signed rank test was used to compare the temporal distance of the  $d$  value peaks between the two  
828 conditions, and the corresponding Z-value was registered, again mirroring the analysis carried out on  
829 the real data. This approach was repeated with replacement for a total of 10000 times, generating  
830 an empirical distribution of Z-values under the null hypothesis that there is no meaningful  
831 information about an object's category in the EEG data.

832 Thirdly, to estimate our classification chance distribution for the random-effects (i.e., trial-averaged)  
833 peak analyses, we used the 51 classification outputs from all participants in a bootstrapping  
834 procedure (Stelzer, Chen, & Turner, 2013). On each of the bootstrapped repetitions, we randomly  
835 selected one of the 51 classification outputs (50 from shuffled labels classifiers and one from a real  
836 labels classifier) per participant, and calculated the  $d$  value group average based on this random  
837 selection for each given time point. This procedure was repeated with replacement 10000 times. To  
838 generate different distributions for the perceptual and semantic classifiers, we run this  
839 bootstrapping approach two times: once where the real labels output from each subject came from  
840 the semantic classifier, and once where the real  $d$ -values came from the perceptual classifier.

#### 841 **4.8 Univariate event-related potential (ERP) analysis**

842 A series of cluster-based permutation tests (Monte Carlo, 2000 repetitions, clusters with a minimum  
843 of 2 neighbouring channels within the FieldTrip software) was carried out in order to test for  
844 differences in ERPs between the two perceptual (photograph vs. line drawing) and the two semantic  
845 (animate vs. inanimate) categories, controlling for multiple comparisons across time and electrodes.  
846 First, we contrasted ERPs during object presentation in the encoding phase in the time interval from  
847 stimulus onset until 500ms post-stimulus. We then carried out the same type of perceptual and  
848 semantic ERP contrasts during retrieval, in this case aligning all trials to the time of the button press.  
849 We used the full time window from 3000ms before until 100ms after the button press, but we  
850 further subdivided this time window into smaller epochs of 300ms to run a series of T-tests, again  
851 using cluster statistics to correct for multiple comparisons across time and electrodes. We were

852 mainly interested in the temporal order of the ERP peaks that differentiated between perceptual  
853 and semantic classes during encoding and retrieval. These peaks are based on statistically  
854 meaningful clusters as described above, but we conducted no further statistical comparisons  
855 between the average perceptual and semantic ERP peaks.

#### 856 **4.9 Data and code availability statement**

857 The data and the custom code that support the findings of this study are available from the  
858 corresponding author upon reasonable request.

#### 859 **Acknowledgments**

860 We thank Alexandru-Andrei Moise, Emma Sutton, Thomas Faherty, Laura De Herde and James Lloyd-  
861 Cox for helping with data collection, and Rodika Sokoliuk for her useful technical support. This work  
862 was supported by an European Research Council Starting Grant (ERC-2016-STG-715714) and a  
863 scholarship from the Midlands Integrative Biosciences Training Partnership (MIBTP), which is a  
864 Biotechnology and Biological Sciences Research Council (BBSRC) funded doctoral training  
865 programme.

#### 866 **Author contributions**

867 J.L.D. and M.W. designed the experiments. J.L.D. conducted the experiment. J.L.D., M.S.T. and C.K.  
868 analysed the data. All authors contributed to the analysis approach and to data interpretation. J.L.D.  
869 and M.W. wrote the first version of the manuscript and all authors contribute in reviewing and  
870 editing.

#### 871 **Competing financial interests**

872 The authors declare no competing financial interests.

#### 873 **References**

- 874 Aggelopoulos, N. C. (2015). Perceptual inference. *Neuroscience and Biobehavioral Reviews*, *55*, 375–  
875 392. <http://doi.org/10.1016/j.neubiorev.2015.05.001>
- 876 Ahissar, M., & Hochstein, S. (1997). Task difficulty and the specificity of perceptual learning. *Nature*,  
877 *387*(6631), 401–406. <http://doi.org/10.1038/387401a0>
- 878 Ashby, F. G. (2000). A Stochastic Version of General Recognition Theory. *Journal of Mathematical*  
879 *Psychology*, *44*(2), 310–329. <http://doi.org/10.1006/jmps.1998.1249>
- 880 Bosch, S. E., Jehee, J. F. M., Fernandez, G., & Doeller, C. F. (2014). Reinstatement of Associative  
881 Memories in Early Visual Cortex Is Signaled by the Hippocampus. *Journal of Neuroscience*,  
882 *34*(22), 7493–7500. <http://doi.org/10.1523/JNEUROSCI.0805-14.2014>
- 883 Brainard, D. H. (1997). The Psychophysics Toolbox. *Spatial Vision*, *10*(4), 433–436.  
884 <http://doi.org/10.1163/156856897X00357>
- 885 Bridson, N. C., Fraser, C. S., Herron, J. E., & Wilding, E. L. (2006). Electrophysiological correlates of  
886 familiarity in recognition memory and exclusion tasks. *Brain Research*, *1114*(1), 149–160.  
887 <http://doi.org/10.1016/j.brainres.2006.07.095>



- 888 Brodeur, M. B., Dionne-Dostie, E., Montreuil, T., & Lepage, M. (2010). The bank of standardized  
889 stimuli (BOSS), a new set of 480 normative photos of objects to be used as visual stimuli in  
890 cognitive research. *PLoS ONE*, *5*(5). <http://doi.org/10.1371/journal.pone.0010773>
- 891 Carlson, T. A., Ritchie, J. B., Kriegeskorte, N., Durvasula, S., & Ma, J. (2014). Reaction Time for Object  
892 Categorization Is Predicted by Representational Distance. *Journal of Cognitive Neuroscience*,  
893 *26*(1), 132–142. [http://doi.org/10.1162/jocn\\_a\\_00476](http://doi.org/10.1162/jocn_a_00476)
- 894 Carlson, T., Tovar, D., Alink, A., & Kriegeskorte, N. (2013). Representational dynamics of object  
895 vision: The first 1000 ms. *Journal of Vision*, *13*(10), 1–19. <http://doi.org/10.1167/13.10.1>.doi
- 896 Carr, M. F., & Frank, L. M. (2012). A single microcircuit with multiple functions: State dependent  
897 information processing in the hippocampus. *Current Opinion in Neurobiology*, *22*(4), 704–708.  
898 <http://doi.org/10.1016/j.conb.2012.03.007>
- 899 Chen, J., Leong, Y. C., Honey, C. J., Yong, C. H., Norman, K. A., & Hasson, U. (2016). Shared memories  
900 reveal shared structure in neural activity across individuals. *Nature Neuroscience*, *20*(1), 115–  
901 125. <http://doi.org/10.1038/nn.4450>
- 902 Cichy, R. M., Pantazis, D., & Oliva, A. (2014). Resolving human object recognition in space and time.  
903 *Nature Publishing Group*, *17*(3), 455–462. <http://doi.org/10.1038/nn.3635>
- 904 Clarke, A., & Tyler, L. K. (2015). Understanding What We See: How We Derive Meaning From Vision.  
905 *Trends in Cognitive Sciences*, *19*(11), 677–687. <http://doi.org/10.1016/j.tics.2015.08.008>
- 906 Combrisson, E., & Jerbi, K. (2015). Exceeding chance level by chance: The caveat of theoretical  
907 chance levels in brain signal classification and statistical assessment of decoding accuracy.  
908 *Journal of Neuroscience Methods*, *250*, 126–136.  
909 <http://doi.org/10.1016/j.jneumeth.2015.01.010>
- 910 Davachi, L. (2006). Item, context and relational episodic encoding in humans. *Current Opinion in*  
911 *Neurobiology*, *16*(6), 693–700. <http://doi.org/10.1016/j.conb.2006.10.012>
- 912 Eichenbaum, H. (2004). Hippocampus: Cognitive processes and neural representations that underlie  
913 declarative memory. *Neuron*, *44*(1), 109–120. <http://doi.org/10.1016/j.neuron.2004.08.028>
- 914 Eichenbaum, H., Yonelinas, A. P., & Ranganath, C. (2007). The Medial Temporal Lobe and  
915 Recognition Memory. *Annual Review of Neuroscience*, *30*(1), 123–152.  
916 <http://doi.org/10.1146/annurev.neuro.30.051606.094328>
- 917 Fabiani, M., Gratton, G., & Federmeier, K. (2007). Event-Related Brain Potentials: Methods, Theory  
918 and Applications. In J. Cacioppo, L. Tassinary, & G. Berntson (Eds.), *Handbook of*  
919 *Psychophysiology*. Cambridge: Cambridge University Press.
- 920 Fell, J., Wagner, T., Staresina, B. P., Ranganath, C., Elger, C. E., & Axmacher, N. (2016). Rhinal-  
921 Hippocampal Information Flow Reverses Between Memory Encoding and Retrieval (pp. 105–  
922 114). [http://doi.org/10.1007/978-3-319-46687-3\\_11](http://doi.org/10.1007/978-3-319-46687-3_11)
- 923 Helmholtz, H. (1924). *Treatise on physiological optics. Optical Society of America (1924–5), English*  
924 *translation*. (J. P. C. Southall, Ed.). Rochester: Optical Society of America.  
925 <http://doi.org/10.1037/13536-000>
- 926 Henson, R. N., & Gagnepain, P. (2010). Predictive, interactive multiple memory systems.  
927 *Hippocampus*, *20*(11), 1315–26. <http://doi.org/10.1002/hipo.20857>

- 928 Jafarpour, A., Fuentemilla, L., Horner, A. J., Penny, W., & Duzel, E. (2014). Replay of Very Early  
929 Encoding Representations during Recollection. *Journal of Neuroscience*, 34(1), 242–248.  
930 <http://doi.org/10.1523/JNEUROSCI.1865-13.2014>
- 931 Jamalabadi, H., Alizadeh, S., Schönauer, M., Leibold, C., & Gais, S. (2016). Classification based  
932 hypothesis testing in neuroscience: Below-chance level classification rates and overlooked  
933 statistical properties of linear parametric classifiers. *Human Brain Mapping*, 37(5), 1842–1855.  
934 <http://doi.org/10.1002/hbm.23140>
- 935 James, W. (1890). *Principles of Psychology*. New York: Henry Holt and Company.
- 936 Johnson, J. D., McDuff, S. G. R., Rugg, M. D., & Norman, K. A. (2009). Recollection, Familiarity, and  
937 Cortical Reinstatement: A Multivoxel Pattern Analysis. *Neuron*, 63(5), 697–708.  
938 <http://doi.org/10.1016/j.neuron.2009.08.011>
- 939 Klimesch, W., Doppelmayr, M., Yonelinas, A., Kroll, N. E. A., Lazzara, M., Röhme, D., & Gruber, W.  
940 (2001). Theta synchronization during episodic retrieval: Neural correlates of conscious  
941 awareness. *Cognitive Brain Research*, 12(1), 33–38. [http://doi.org/10.1016/S0926-](http://doi.org/10.1016/S0926-6410(01)00024-6)  
942 [6410\(01\)00024-6](http://doi.org/10.1016/S0926-6410(01)00024-6)
- 943 Kowalczyk, A., & Chapelle, O. (2005). An analysis of the anti-learning phenomenon for the class  
944 symmetric polyhedron. *Lecture Notes in Computer Science (Including Subseries Lecture Notes in*  
945 *Artificial Intelligence and Lecture Notes in Bioinformatics)*, 3734 LNAI, 78–91.  
946 [http://doi.org/10.1007/11564089\\_8](http://doi.org/10.1007/11564089_8)
- 947 Kuhl, B. A., Rissman, J., Chun, M. M., & Wagner, A. D. (2011). Fidelity of neural reactivation reveals  
948 competition between memories. *Proceedings of the National Academy of Sciences*, 108(14),  
949 5903–5908. <http://doi.org/10.1073/pnas.1016939108>
- 950 Kurth-Nelson, Z., Barnes, G., Sejdinovic, D., Dolan, R., & Dayan, P. (2015). Temporal structure in  
951 associative retrieval. *eLife*, 2015(4), 1–18. <http://doi.org/10.7554/eLife.04919>
- 952 Kurth-Nelson, Z., Economides, M., Dolan, R. J., & Dayan, P. (2016). Fast Sequences of Non-spatial  
953 State Representations in Humans. *Neuron*, 91(1), 194–204.  
954 <http://doi.org/10.1016/j.neuron.2016.05.028>
- 955 Lehky, S. R., & Tanaka, K. (2016). Neural representation for object recognition in inferotemporal  
956 cortex. *Current Opinion in Neurobiology*, 37, 23–35. <http://doi.org/10.1016/j.conb.2015.12.001>
- 957 Lemm, S., Blankertz, B., Dickhaus, T., & Müller, K. R. (2011). Introduction to machine learning for  
958 brain imaging. *NeuroImage*, 56(2), 387–399. <http://doi.org/10.1016/j.neuroimage.2010.11.004>
- 959 Martin, C. B., Douglas, D., Newsome, R. N., Man, L. L., & Barense, M. (2018). Integrative and  
960 distinctive coding of visual and conceptual object features in the ventral visual stream. *eLife*, 7.  
961 <http://doi.org/10.7554/eLife.31873>
- 962 Mecklinger, A. (2006). Electrophysiological Measures of Familiarity Memory. *Clinical EEG and*  
963 *Neuroscience*, 37(4), 292–299. <http://doi.org/10.1177/155005940603700406>
- 964 Michelmann, S., Bowman, H., & Hanslmayr, S. (2016). The Temporal Signature of Memories:  
965 Identification of a General Mechanism for Dynamic Memory Replay in Humans. *PLoS Biology*,  
966 14(8), 1–27. <http://doi.org/10.1371/journal.pbio.1002528>
- 967 Moscovitch, M. (2008). The Hippocampus As a “Stupid,” Domain-Specific Module: Implications for  
968 Theories of Recent and Remote Memory, and of Imagination. *Canadian Journal of Experimental*

- 969 *Psychology*, 62(1), 62–79. <http://doi.org/10.1037/1196-1961.62.1.62>
- 970 O’Connell, R. G., Dockree, P. M., & Kelly, S. P. (2012). A supramodal accumulation-to-bound signal  
971 that determines perceptual decisions in humans. *Nature Neuroscience*, 15(12), 1729–1735.  
972 <http://doi.org/10.1038/nn.3248>
- 973 Oostenveld, R., Fries, P., Maris, E., & Schoffelen, J.-M. (2011). FieldTrip: Open Source Software for  
974 Advanced Analysis of MEG, EEG, and Invasive Electrophysiological Data. *Computational  
975 Intelligence and Neuroscience*, 2011, 1–9. <http://doi.org/10.1155/2011/156869>
- 976 Ritchie, J. B., Tovar, D. A., & Carlson, T. A. (2015). Emerging Object Representations in the Visual  
977 System Predict Reaction Times for Categorization. *PLoS Computational Biology*, 11(6), 1–19.  
978 <http://doi.org/10.1371/journal.pcbi.1004316>
- 979 Rugg, M. D., & Curran, T. (2007). Event-related potentials and recognition memory. *Trends in  
980 Cognitive Sciences*, 11(6), 251–257. <http://doi.org/10.1016/j.tics.2007.04.004>
- 981 Schacter, D. L. (2012, March). Constructive memory: past and future. *Dialogues in Clinical  
982 Neuroscience*. France.
- 983 Schacter, D. L., Guerin, S. a, & St Jacques, P. L. (2011). Memory distortion: an adaptive perspective.  
984 *Trends in Cognitive Sciences*, 15(10), 467–74. <http://doi.org/10.1016/j.tics.2011.08.004>
- 985 Serre, T., Oliva, A., & Poggio, T. (2007). A feedforward architecture accounts for rapid categorization.  
986 *Proceedings of the National Academy of Sciences*, 104(15), 6424–6429.  
987 <http://doi.org/10.1073/pnas.0700622104>
- 988 Sols, I., DuBrow, S., Davachi, L., & Fuentemilla, L. (2017). Event Boundaries Trigger Rapid Memory  
989 Reinstatement of the Prior Events to Promote Their Representation in Long-Term Memory.  
990 *Current Biology*, 27(22), 3499–3504.e4. <http://doi.org/10.1016/j.cub.2017.09.057>
- 991 Squire, L. R., Stark, C. E. L., & Clark, R. E. (2004). the Medial Temporal Lobe. *Annual Review of  
992 Neuroscience*, 27(1), 279–306. <http://doi.org/10.1146/annurev.neuro.27.070203.144130>
- 993 Staresina, B. P., Cooper, E., & Henson, R. N. (2013). Reversible Information Flow across the Medial  
994 Temporal Lobe: The Hippocampus Links Cortical Modules during Memory Retrieval. *Journal of  
995 Neuroscience*, 33(35), 14184–14192. <http://doi.org/10.1523/JNEUROSCI.1987-13.2013>
- 996 Staresina, B. P., & Davachi, L. (2008). Selective and Shared Contributions of the Hippocampus and  
997 Perirhinal Cortex to Episodic Item and Associative Encoding. *Journal of Cognitive Neuroscience*,  
998 20(8), 1478–1489. <http://doi.org/10.1162/jocn.2008.20104>
- 999 Staresina, B. P., Henson, R. N. a, Kriegeskorte, N., & Alink, A. (2012). Episodic reinstatement in the  
1000 medial temporal lobe. *The Journal of Neuroscience : The Official Journal of the Society for  
1001 Neuroscience*, 32(50), 18150–6. <http://doi.org/10.1523/JNEUROSCI.4156-12.2012>
- 1002 Staudigl, T., Zaehle, T., Voges, J., Hanslmayr, S., Esslinger, C., Hinrichs, H., ... Richardson-Klavehn, A.  
1003 (2012). Memory signals from the thalamus: Early thalamocortical phase synchronization  
1004 entrains gamma oscillations during long-term memory retrieval. *Neuropsychologia*, 50(14),  
1005 3519–3527. <http://doi.org/10.1016/j.neuropsychologia.2012.08.023>
- 1006 Stelzer, J., Chen, Y., & Turner, R. (2013). Statistical inference and multiple testing correction in  
1007 classification-based multi-voxel pattern analysis (MVPA): Random permutations and cluster size  
1008 control. *NeuroImage*, 65, 69–82. <http://doi.org/10.1016/j.neuroimage.2012.09.063>

- 1009 Waldhauser, G. T., Braun, V., & Hanslmayr, S. (2016). Episodic Memory Retrieval Functionally Relies  
1010 on Very Rapid Reactivation of Sensory Information. *The Journal of Neuroscience*, *36*(1), 251–  
1011 260. <http://doi.org/10.1523/JNEUROSCI.2101-15.2016>
- 1012 Wimber, M., Alink, A., Charest, I., Kriegeskorte, N., & Anderson, M. C. (2015). Retrieval induces  
1013 adaptive forgetting of competing memories via cortical pattern suppression. *Nature*  
1014 *Neuroscience*, *18*(4), 582–589. <http://doi.org/10.1038/nn.3973>
- 1015 Wimber, M., Maaß, A., Staudigl, T., Richardson-Klavehn, A., & Hanslmayr, S. (2012). Rapid memory  
1016 reactivation revealed by oscillatory entrainment. *Current Biology : CB*, *22*(16), 1482–6.  
1017 <http://doi.org/10.1016/j.cub.2012.05.054>
- 1018 Yonelinas, A. P., Aly, M., Wang, W.-C., & Koen, J. D. (2010). Recollection and familiarity: Examining  
1019 controversial assumptions and new directions. *Hippocampus*, *20*(11), 1178–1194.  
1020 <http://doi.org/10.1002/hipo.20864>
- 1021
